# Supplementary material for: Relationships among Perceptions of Dying Well, Attitudes toward Advance Directives, and Preferences for Advance Directives among Elderly Living Alone
Source: PubMed Central journal article supplement — Hanguk Hosupisu Wanhwa Uiryo Hakhoe Chi. 2020 Dec 1;23(4):241–51. doi: 10.14475/kjhpc.2020.23.4.241 (PMC10332727; doi:10.14475/kjhpc.2020.23.4.241), 2020-12-01
Supplement: KJHPC-23-241_Supple.pdf [file KJHPC-23-241_Supple.pdf]

# 독거노인의 좋은 죽음에 대한 인식과 사전의료의향서에 대한 태도와 선호도

류은진, 최소은\*

송원대학교 간호학과, \*국립목포대학교 간호학과

## Relationships among Perceptions of Dying Well, Attitudes toward Advance Directives, and Preferences for Advance Directives among Elderly Living Alone

Eun-Jin Ryu, R.N., Ph.D. and So-Eun Choi, R.N., Ph.D.\*

Department of Nursing, Songwon University, Gwangju, \*Department of Nursing, Mokpo National University, Muan, Korea

**Purpose:** This study investigated awareness of dying well, as well as attitudes and preferences toward advance directives (ADs), among elderly individuals who lived alone. **Methods:** The participants were 173 elderly people living alone. Data were collected from July 2019 to September 2019 using questionnaires on perceptions of dying well, awareness of advance directives, and general characteristics. **Results:** The majority of participants (68.2%) stated that they had never heard of advance directives. The information they requested to include in their advance directives mostly involved decisions on pain treatment, such as the use of analgesic drugs in the final stages of a terminal disease. Perceptions of dying well were statistically significantly different according to age and education. **Conclusion:** This study discussed the attitudes and preferences of elderly living alone regarding advance directives to provide basic resources for the systematic and active use of advance directives.

**Key Words:** Aged, Death, Advance directives

Received August 24, 2020  
Revised October 21, 2020  
Accepted October 27, 2020

Correspondence to  
Choi So-Eun  
ORCID:  
<https://orcid.org/0000-0003-4805-3446>  
E-mail: seami@mokpo.ac.kr

## 서론

### 1. 연구의 필요성

현대사회는 인구의 고령화, 배우자의 사별, 황혼이혼의 증가, 노인부양역의 약화 등으로 자발적 비자발적인 독거노인이 증가하고 있으며 이로 인해 홀로 생활해야 한다는 어려움을 경험하며 주변의 지지체계와 단절되어 신체적 사회적 고립 가능성이 높다[1]. 독거노인이란 자녀의 존재 여부와 관계없이 자녀와 거주

지를 분리한 홀몸노인으로 사회·경제적 능력 변화에 의해 공적 부조 또는 사회복지 서비스가 필요한 노인이다. 독거노인은 사회적 고립, 경제적 빈곤, 만성질환의 위험성, 가까운 사람의 죽음 등 스트레스를 경험하게 되고[2], 독거로 인해 취약해진 노후 생활은 생의 마지막인 죽음에 대한 불안이 높아질 수밖에 없다[3]. Ng 등[1]의 연구에서 독거노인의 독거와 사망률의 연관성에 따라 삶의 마지막 과정인 죽음을 ‘어떻게’ 맞이할 것인가에 대한 관심이 증가하고 있지만, 독거노인은 죽음과 관련된 상황에서 구체적인 생각이나 계획을 하지 못한 경우가 대부분이다. 인간이 경

험하는 죽음의 상황은 피할 수 없는 삶의 문제이며 개인마다 다르지만 어떠한 상황에서도 죽음에 대한 의미를 발견하고, 품위를 유지하며 좋은 죽음에 대한 욕구가 충족되어야 한다[4]. 좋은 죽음은 무의미한 삶의 연장을 피하고 죽음에 대한 준비를 하며 인격적인 존엄성과 편안함을 유지하고 임종하는 것이며, 죽음은 인간의 삶을 구성하는 필수 단계이다[5]. 좋은 죽음과 관련된 선행 연구를 살펴보면, 지역사회 65세 이상 노인을 대상으로 한 연구[6,7]와 사별한 노인을 대상으로 한 연구[8]는 있으나 독거노인만을 대상으로 한 국내연구는 없다.

사전의료의향서(Advance Directives, ADs)는 개인이 자신의 의료행위에 대한 의사결정이나 희망을 나타내는 것이 불가능할 때를 대비하여 자신이 원하거나 원하지 않는 의료행위에 대해 문서화한 것으로 인격적인 자율성과 존엄성을 보전하려는 개인의 자기 결정권이다[9].

노인은 기저질환의 악화나 임종기에 의사결정능력을 상실하여 본인의 의사와 상관없이 연명치료를 받는 상황이 되기도 한다[10]. Chang 등[11]의 연구에서 자신의 질병에 대한 의학적 정보를 제대로 받지 못해 치료에 대한 의료적 결정이나 계획을 세울 수 없었다고 하였으며, 지역사회 노인을 대상으로 한 연구[12,13]에서는 사전의료의향서에 대한 지식이 낮았다.

대부분 노인들은 임종이 임박해지면 보호자에 의해 의학적 연명치료나 사전의료의향서에 대한 결정이 이루어지며[14], 생명 연장 또는 연명의료중단과 관련된 의사결정을 해야 하는 순간에 보호자와 의료진 간에 의견이 일치하지 못하는 윤리적 딜레마에 직면하게 된다[15]. 이러한 특성을 바탕으로 정상적인 의사결정 능력이 있을 때 본인의 가치관을 반영한 의사결정이 이루어져야 하며 연명치료에 대해 스스로가 동의할 것인지 거부할 것인지를 선택하여 사전의료의향서를 작성하는 것이 필요하다[16].

사전의료의향서를 작성하는 것은 자신의 존엄성과 좋은 죽음에 대한 의사결정이므로 독거로 인해 죽음에 대한 불안이 높은 독거노인의 사전의료의향서 작성 여부에 대해 알아볼 필요가 있다. 사전의료의향서에 대한 선행연구로 지역사회 거주 노인을 대상으로 한 연구[3,12,17,18]가 있으나 독거노인만을 대상으로 한 연구는 없다.

노인의 대부분은 자신의 연명치료에 대한 결정에 있어서 노인 자신이 주체가 되기를 희망한다[3]. 독거노인의 삶에서 좋은 죽음을 어떻게 인식하고 어떠한 의미를 가지고 있는지 등 중요하게 다루어져야 함에도 노년기의 죽음을 보편화하고 당연시하는 분위기 속에서 좋은 죽음에 대한 인식들이 방치되고 있다. 따라서 독거노인이 좋은 죽음을 준비할 수 있도록 돕고 자신의 삶을 마무리하는 과정에서 사전의료의향서에 대한 자기 의사결정을 돕기 위해서는 이에 대한 실태와 관계를 확인할 필요가 있다.

이에 지역사회의 독거노인 인구가 증가하는 시점에서, 독거노인의 좋은 죽음에 대한 인식과 사전의료의향서에 대한 태도와 선호도의 관계를 확인하여 독거노인이 죽음을 수용하고 준비하면서 자기 결정을 할 수 있도록 돕는 프로그램에 필요한 기초자료를 제공하고자 한다.

## 2. 연구 목적

본 연구는 65세 이상 지역사회 거주 독거노인의 좋은 죽음에 대한 인식과 사전의료의향서에 대한 태도와 선호도를 파악하기 위함이며, 구체적인 목적은 다음과 같다.

- 1) 대상자의 좋은 죽음에 대한 인식도를 파악한다.
- 2) 대상자의 일반적 특성에 따른 좋은 죽음에 대한 인식도 차이를 파악한다.
- 3) 대상자의 사전의료의향서에 대한 태도와 선호도를 파악한다.

## 대상 및 방법

### 1. 연구 설계

본 연구는 65세 이상 지역사회 거주 독거노인의 좋은 죽음에 대한 인식과 사전의료의향서에 대한 태도와 선호도를 파악하기 위한 서술적 조사연구이다.

### 2. 연구 대상

본 연구의 대상자는 광주광역시에 거주하는 65세 이상의 독거노인으로 본 연구의 목적을 이해하고 의사소통에 문제가 없으며 연구 참여에 자발적으로 동의한 173명을 대상으로 하였다. 연구 대상자의 선정기준은 1) 65세 이상 남, 여 노인, 2) 자녀 혹은 배우자와 함께 살고 있지 않은 단독가구 거주자, 3) 국문해독 수준 및 언어적 의사소통이 가능한 노인으로, 본 연구의 목적을 이해하고 자발적으로 참여하기로 동의한 자이다.

연구표본 크기는 G\*power 3.1.9 프로그램을 사용하여 산출하였다. 양측검정으로 유의수준( $\alpha$ )=0.05, 검정력( $1-\beta$ )=0.80, 중간 효과크기 0.50를 적용하여 두 군의 차이를 확인하기 위해 130명이 산출되었다. 이를 토대로 탈락률 30%를 고려하여 180명에게 설문지를 배부하였고, 이 중 응답이 불성실하거나 설문 중단한 7부를 제외한 총 173부를 최종 결과분석에 활용하였다.

### 3. 연구 도구

#### 1) 대상자의 인구 사회학적 특성

대상자의 인구 사회학적 특성은 연령, 성별, 독거 기간, 종교, 학력, 주관적 경제상태, 주 수입처, 주관적 건강상태, 좋은 죽음

에 대한 정보로 총 9문항으로 구성하였다. 경제상태와 건강상태는 대상자가 인지하는 주관적인 상태로 측정하였다.

## 2) 좋은 죽음에 대한 인식

좋은 죽음에 대한 인식을 확인하기 위해 Schwartz 등[19]이 개발한 도구를 Jeong [20]이 번안한 도구를 사용하였다. 본 도구는 친밀감 9문항, 통제감 3문항, 임상증상 5문항으로 3개의 하위 영역, 총 17문항의 4 척도로 구성되었다. 각 문항에 대한 응답은 ‘전혀 중요하지 않다’ 1점부터 ‘매우 중요하다’ 4점으로 응답할 수 있고 점수가 높을수록 좋은 죽음에 대한 인식이 높음을 의미한다. 본 도구의 개발 당시 신뢰도 Cronbach's  $\alpha=0.87$ 이었으며, 본 연구에서 신뢰도 Cronbach's  $\alpha=0.83$ 이었다.

## 3) 사전의료의향서에 대한 태도와 선호도

사전의료의향서에 대한 태도와 선호도는 Akabayashi 등[21]이 개발한 도구를 Yun [22]이 원저자의 승인과 번역과정 후 전문가 타당도를 거쳐 최종 13문항으로 구성된 도구를 사용하여 측정하

였다.

본 도구는 ‘사전의료의향서의 인식’, ‘갑작스러운 상황을 대비하여 의학적 치료에 대한 사전 의사표현’, ‘사전의료의향서의 작성 의지’, ‘대리인에 의한 작성 여부’, ‘생명연장치료 동의’, ‘통증이 심하고 회복할 희망이 없으며 죽음이 임박했을 때 치료방법’, ‘통증이 심하고 회복할 희망이 없으며 죽음이 임박했을 때 정보 제공’ 등의 항목은 예/아니오/모름으로 응답하도록 하였으며, ‘사전의료의향서 작성 찬성 이유’, ‘사전의료의향서에 포함 내용’, ‘사전의료의향서 작성 반대 이유’는 제시된 답가지 중 해당 항목을 모두 표기하도록 하였다.

## 4. 자료 수집

본 연구의 자료수집은 국립목포대학교 생명윤리위원회(MNUIRB-20181030-SB-011-01)의 승인 후 2019년 7월 1일부터 9월 31일까지 약 3개월 동안 실시하였다. 연구자가 경로당 12곳, 복지관 10곳에 직접 방문하여 연구의 목적과 취지를 설명하였다. 설문지를 통하여 자가보고 방식으로 조사하였으며 설문 조사에 소요된 시간은 약 25분 정도 소요되었다. 작성된 설문지는 회수용 서류 봉투에 넣어 연구자가 직접 수거하였으며 설문조사에 참여한 대상자에게 소정의 답례품을 제공하였다.

Table 1. Characteristics of Participants (N=173).

| Characteristics               | Categories          | n (%)      | Mean±SD      |
|-------------------------------|---------------------|------------|--------------|
| Age (yr)                      | 60~69               | 58 (33.5)  | 74.67 ± 7.20 |
|                               | 70~79               | 69 (39.9)  |              |
|                               | ≥80                 | 46 (26.6)  |              |
| Sex                           | Male                | 52 (30.1)  | 10.02 ± 8.71 |
|                               | Female              | 121 (69.9) |              |
| Duration of living alone (yr) | 1~5                 | 67 (38.7)  | 10.02 ± 8.71 |
|                               | 6~10                | 53 (30.7)  |              |
|                               | 11~20               | 36 (20.8)  |              |
|                               | ≥21                 | 17 (9.8)   |              |
| Religion                      | Yes                 | 88 (50.9)  | 10.02 ± 8.71 |
|                               | No                  | 85 (49.1)  |              |
| Education                     | No formal education | 42 (24.3)  | 10.02 ± 8.71 |
|                               | Elementary school   | 63 (36.4)  |              |
|                               | Middle school       | 36 (20.8)  |              |
|                               | ≥High school        | 32 (18.5)  |              |
| Financial status              | High                | 4 (2.3)    | 10.02 ± 8.71 |
|                               | Moderate            | 104 (60.1) |              |
|                               | Low                 | 65 (37.6)  |              |
| Income                        | Pension             | 71 (41.0)  | 10.02 ± 8.71 |
|                               | Government support  | 43 (24.9)  |              |
|                               | Children's support  | 49 (28.3)  |              |
|                               | Others              | 10 (5.8)   |              |
| Health status                 | Good                | 24 (13.9)  | 10.02 ± 8.71 |
|                               | Moderate            | 106 (61.3) |              |
|                               | Poor                | 43 (24.8)  |              |
| Information about dying well  | Yes                 | 43 (24.9)  | 10.02 ± 8.71 |
|                               | No                  | 130 (75.1) |              |

Table 2. Perceptions of Dying Well (N=173).

| Items                                                    | Mean ± SD   |
|----------------------------------------------------------|-------------|
| Total                                                    | 3.02 ± 0.42 |
| Personal control                                         | 3.06 ± 0.64 |
| That the ability to communicate be present until death   | 3.13 ± 0.72 |
| That there be control of bodily functions until death    | 3.10 ± 0.75 |
| That there be mental alertness until the end             | 2.97 ± 0.78 |
| Clinical                                                 | 3.04 ± 0.50 |
| That it be painless or largely pain-free                 | 3.16 ± 0.69 |
| That it occur naturally, without technical equipment     | 3.18 ± 0.79 |
| That the dying period be short                           | 3.08 ± 0.79 |
| That death occurs during sleep                           | 3.03 ± 0.91 |
| That it be sudden and unexpected                         | 2.76 ± 0.85 |
| Closure                                                  | 3.00 ± 0.64 |
| That it be peaceful                                      | 3.49 ± 0.69 |
| That loved ones be present                               | 3.34 ± 0.78 |
| That family and doctors follow the person's wishes       | 3.04 ± 0.74 |
| That the person's spiritual needs be met                 | 3.04 ± 0.83 |
| That the person had an opportunity to say good-bye       | 3.01 ± 0.85 |
| That the person be able to accept death                  | 2.97 ± 0.83 |
| That the person had a chance to complete important tasks | 2.80 ± 0.85 |
| That the person was able to remain at home               | 2.71 ± 0.96 |
| That the person lived until a key event                  | 2.67 ± 0.85 |

## 5. 윤리적 고려

본 연구에서는 국립목포대학교의 생명윤리심의위원회의 연구 승인(MNUIRB-20181030-SB-011-01)을 받은 후 진행되었다. 대상자에게 연구의 목적과 방법을 설명하고 연구참여를 자발적으로 동의한 대상자에게 서면으로 연구동의서를 받았다. 설문 참여와 중단은 자발적이며 이로 인한 불이익이 없음을 설명하고, 수집된 자료는 무기명으로 통계처리 되므로 철저하게 비밀이 보장되고 연구목적으로만 사용될 것임을 알렸다. 수집된 자료는 익명으로 처리하며 잠금장치가 있는 캐비닛에 보관하고, 연구보고 종료 후 3년간 보관 후 파쇄기를 이용하여 분쇄할 예정이다.

## 6. 자료 분석

수집된 자료의 통계 처리를 SPSS WIN ver. 23.0 프로그램을 이용하여 분석하였다.

1) 대상자의 일반적 특성, 좋은 죽음에 대한 인식도, 사전의료 의향서에 대한 태도와 선호도는 실수, 백분율, 평균과 표준편차 등 기술통계로 분석하였다.

2) 대상자의 일반적 특성에 따른 좋은 죽음에 대한 인식도 차이는 t-test와 ANOVA로 분석하였고, 사후검정은 Scheffé test로 분석하였다.

## 결과

### 1. 대상자의 일반적 특성

본 연구 대상자의 평균연령은 74.67세로 여성 121명(69.9%), 남성 52명(30.1%)이었다. 독거 기간은 평균 10년이며, 1~5년이 53명(38.7%)이었다. 학력은 초등학교 졸업이 63명(36.4%)이었으며, 경제 상태는 보통이 104명(60.1%)이었다. 주 수입처는 '본

Table 3. Perceptions of Dying Well by General Characteristics (N=173).

| Characteristics               | Categories                       | Perceptions of dying well |        |                |
|-------------------------------|----------------------------------|---------------------------|--------|----------------|
|                               |                                  | Mean $\pm$ SD             | t or F | P (Scheffé)    |
| Age (yr)                      | 60~69                            | 3.14 $\pm$ 0.49           | 3.49   | 0.032          |
|                               | 70~79                            | 2.96 $\pm$ 0.38           |        |                |
|                               | $\geq 80$                        | 2.97 $\pm$ 0.36           |        |                |
| Sex                           | Male                             | 2.98 $\pm$ 0.31           | -1.15  | 0.250          |
|                               | Female                           | 3.05 $\pm$ 0.46           |        |                |
| Duration of living alone (yr) | 1~5                              | 3.06 $\pm$ 0.35           | 0.46   | 0.707          |
|                               | 6~10                             | 3.03 $\pm$ 0.35           |        |                |
|                               | 11~20                            | 2.97 $\pm$ 0.53           |        |                |
|                               | $\geq 21$                        | 2.97 $\pm$ 0.59           |        |                |
| Religion                      | Yes                              | 3.03 $\pm$ 0.42           | 0.12   | 0.908          |
|                               | No                               | 3.02 $\pm$ 0.42           |        |                |
| Education                     | No formal education <sup>a</sup> | 2.92 $\pm$ 0.38           | 3.71   | 0.012<br>(a<b) |
|                               | Elementary school                | 3.02 $\pm$ 0.41           |        |                |
|                               | Middle school                    | 2.97 $\pm$ 0.53           |        |                |
|                               | $\geq$ High school <sup>b</sup>  | 3.23 $\pm$ 0.29           |        |                |
| Financial status              | High                             | 2.88 $\pm$ 0.18           | 0.69   | 0.500          |
|                               | Moderate                         | 3.05 $\pm$ 0.44           |        |                |
|                               | Low                              | 2.99 $\pm$ 0.39           |        |                |
| Income                        | Pension                          | 3.12 $\pm$ 0.50           | 2.30   | 0.079          |
|                               | Government support               | 2.98 $\pm$ 0.24           |        |                |
|                               | Children's support               | 2.93 $\pm$ 0.39           |        |                |
|                               | Others                           | 2.96 $\pm$ 0.49           |        |                |
| Health status                 | Good                             | 3.08 $\pm$ 0.52           | 0.39   | 0.681          |
|                               | Moderate                         | 3.03 $\pm$ 0.42           |        |                |
|                               | Poor                             | 2.99 $\pm$ 0.36           |        |                |
| Information about dying well  | Yes                              | 3.10 $\pm$ 0.31           | 1.58   | 0.117          |
|                               | No                               | 3.00 $\pm$ 0.45           |        |                |

인의 언급' 71명(41.0%), '자녀' 49명(28.3%) 순이었으며 좋은 죽음에 대해 들어보지 못함이 130명(75.1%)이었다(Table 1).

## 2. 대상자의 좋은 죽음에 대한 인식

대상자의 좋은 죽음에 대한 인식은  $3.02 \pm 0.42$ 점이었으며, 하위영역으로는 통제감  $3.06 \pm 0.64$ 점, 임상증상  $3.04 \pm 0.50$ 점, 친

밀감  $3.00 \pm 0.64$ 점 순이었다. 통제감에서 '임종 시까지 의사소통이 가능한 것이다'가 높았으며, 임상증상에서 '기계적 도움 없이 자연스럽게 사망하는 것이다', 친밀감에서는 '평화롭게 죽는 것이다'가 높았다(Table 2).

## 3. 대상자의 일반적 특성에 따른 좋은 죽음 인식의 차이

연구 대상자의 일반적 특성 중 60대 독거노인의 좋은 죽음에 대한 인식이  $3.14 \pm 0.49$ 점으로 높았다( $F=3.49$ ,  $P=0.032$ ). 학력에 따라서는 고등학교 졸업 이상에서 좋은 죽음에 대한 인식이  $3.23 \pm 0.29$ 점으로 무학의  $2.92 \pm 0.38$ 점보다 유의하게 높았다( $F=3.71$ ,  $P=0.012$ ) (Table 3).

## 4. 사전의료의향서에 대한 태도와 선호도

### 1) 사전의료의향서에 대한 태도와 선호도

사전의료의향서에 대해 대상자의 55명(31.8%)이 들어본 적 있었으며, 118명(68.2%)은 의미를 모르거나 들어 본 적이 없었다고 하였다. '갑작스러운 질병과 사고를 대비하여 의학적 치료에 대하여 미리 의사 표현을 해 놓은 것'에 대하여 133명(76.9%)이 찬성하였으나, 사전의료의향서 작성에 대해서는 76명(43.9%)만이 작성 의향이 있다고 하였다. 대리인에 의한 작성 동의는 83명(48.0%)이었으며, '회복할 희망이 없고, 죽음이 가까이 오고 있을 때 통증만 억제하고 생명연장치료는 거부함' 106명(61.3%),

Table 4. Advance Directives and Perceptions of Dying Well (N=173).

| Characteristics                                     | Categories                  | n (%)      |
|-----------------------------------------------------|-----------------------------|------------|
| Awareness regarding ADs                             | Know about ADs              | 55 (31.8)  |
|                                                     | Not heard of ADs            | 118 (68.2) |
| Preference for ADs                                  | Agree                       | 133 (76.9) |
|                                                     | Disagree                    | 40 (23.1)  |
| Intention to complete an AD                         | Yes                         | 76 (43.9)  |
|                                                     | No                          | 97 (56.1)  |
| Would allow a surrogate to complete an AD           | Yes                         | 83 (48.0)  |
|                                                     | No                          | 90 (52.0)  |
| Preferred treatment if there is no hope of recovery | Life-sustaining treatment   | 45 (26.0)  |
|                                                     | Pain management             | 106 (61.3) |
|                                                     | Unknown                     | 22 (12.7)  |
| Preference for information disclosure               | To disclose information     | 85 (49.1)  |
|                                                     | Not to disclose information | 78 (45.1)  |
|                                                     | Unknown                     | 10 (5.8)   |

ADs: advance directives.

Table 5. Reasons for Completing an Advance Directives and Content to be Included (N=133).

| Reasons                                                                                                                                                           | n (%)*     |
|-------------------------------------------------------------------------------------------------------------------------------------------------------------------|------------|
| I hope to not burden my family with end-of-life decisions                                                                                                         | 108 (82.1) |
| There may be differences in opinions between family members                                                                                                       | 105 (78.9) |
| I am aware that I could possibly lose my decision-making power as a result of becoming seriously ill or injured                                                   | 101 (75.9) |
| I want to undergo the treatment of my choice                                                                                                                      | 99 (74.4)  |
| I want to decide for myself                                                                                                                                       | 89 (66.9)  |
| I want to seriously consider my end-of-life decisions                                                                                                             | 79 (59.3)  |
| An acquaintance has spoken about this issue                                                                                                                       | 45 (33.8)  |
| This issue has become a topic in the mass media                                                                                                                   | 41 (30.8)  |
| I want to make known my wishes regarding being a donor                                                                                                            | 39 (29.3)  |
| I do not trust the current medical profession                                                                                                                     | 25 (18.7)  |
| Content                                                                                                                                                           | n (%)*     |
| Treatment-related decisions regarding pain during terminal stages (e.g. whether or not you wish to be treated with painkillers)                                   | 104 (78.1) |
| Treatment-related decisions in the case of becoming terminally ill (e.g. whether or not you wish to receive life-extending treatment)                             | 103 (77.4) |
| Treatment-related decisions regarding end-of-life decisions (e.g. whether you would like to die in the hospital)                                                  | 92 (69.1)  |
| Whether or not you would like to be informed of your diagnosis and prognosis (e.g. whether or not you would like all information to be directly disclosed to you) | 90 (67.6)  |
| Treatment-related decisions in the case of brain death or long-term comatose status                                                                               | 83 (62.4)  |
| Expressing whether or not you would like to be a donor for transplantation                                                                                        | 67 (50.3)  |
| Expressing whether or not you would like to donate your body for educational purposes                                                                             | 38 (28.5)  |

\*Multiple responses.

‘통증에 상관없이 생명 연장 치료를 받음’ 45명(26.0%)이었다. ‘회복할 희망이 없고, 죽음이 가까이 오고 있을 때 본인에게 증상, 예후에 대한 모든 정보를 제공 받기를 원함’이 85명(49.1%), ‘본인에게 알려 줄 필요 없음’이 78명(45.1%)이었다(Table 4).

## 2) 사전의료의향서 찬성 이유 및 사전의료의향서에 포함하고 싶은 내용

사전의료의향서 작성에 찬성한 대상자는 133명으로 그 이유는 ‘가족들에게 의사결정에 대한 부담감을 주고 싶지 않기 때문이다’ 108명(82.1%), ‘본인과 가족들 사이 다른 의견이 있을 수 있기 때문이다’ 105명(78.9%), ‘갑작스러운 사고나 심각한 질병으로 인해 나의 판단력이 약해질 수 있다는 것을 알기 때문이다’ 101명(75.9%) 순으로 나타났다.

사전의료의향서에 포함하고 싶은 내용은 ‘질환 말기 상황이 되었을 경우 진통제 사용과 같은 통증치료에 관한 결정’ 104명(78.1%), ‘질환 말기 상황이 되었을 경우 생명연장치료를 받을 것인지 여부에 관한 결정’ 103명(77.4%), ‘마지막 치료에 관한 의사결정’이 92명(69.1%) 순이었다(Table 5).

## 3) 사전의료의향서 반대 이유

사전의료의향서 작성에 반대한 대상자는 40명으로 그 이유는 ‘그러한 상황이 왔을 경우, 가족들이 판단해 줄 것이다’ 32명(80.0%), ‘그러한 상황이 왔을 경우, 의사가 판단해 줄 것이다’ 24명(60.0%), ‘기억을 잃어버리거나, 결국 사망한다는 것을 생각하고 싶지 않다’ 22명(55.0%) 순이었다(Table 6).

Table 6. Reasons for Refusing to Complete an Advance Directive (N=40).

| Reasons                                                                                                | n (%)*    |
|--------------------------------------------------------------------------------------------------------|-----------|
| My family will make such decisions when the time is needed                                             | 32 (80.0) |
| My physician will make such decisions when the time is needed                                          | 24 (60.0) |
| I do not want to think that I will eventually die or lose my memory                                    | 22 (55.0) |
| It is impossible to think of such decisions as it is impossible to imagine oneself in such a situation | 20 (50.0) |
| I am currently healthy and there is no need to consider such decisions                                 | 17 (42.5) |
| I feel that I will never be in situation where I would need an AD                                      | 14 (35.0) |
| I have no information about ADs                                                                        | 13 (32.5) |
| At my present age, there is no need to consider such decisions                                         | 6 (15.0)  |

\* Multiple responses.

## 고찰

본 연구는 지역사회에 거주하는 65세 이상 독거노인의 좋은 죽음에 대한 인식과 사전의료의향서에 대한 태도와 선호도를 파악하여 앞으로 이들의 좋은 죽음을 준비하도록 도울 수 있는 중재 개발을 위한 기초자료를 마련하기 위해 시행되었으며, 그 결과를 토대로 논의하고자 한다.

본 연구 대상자 중 좋은 죽음에 대해 들어보지 못한 대상자가 75.1%이었으며, 사전의료의향서에 대해서 들어보지 못한 대상자는 68.2%로 지역사회 노인[23]을 대상으로 한 연구의 34.5%에 비해 높아 독거노인의 사전의료의향서 인식이 낮음을 확인할 수 있었다. 이는 독거노인의 특성으로 인한 사회적 고립이나 배우자의 사망과 자녀의 독립 등으로 인한 필연적 고립과 관련된 소통의 부재를 생각해볼 수 있다. 좋은 죽음과 사전의료의향서에 대한 인식을 높이기 위해서는 가정방문이나 언론매체 등 적극적인 홍보활동을 통해 자연스럽게 받아들이 수 있도록 사회적인 여건 조성이 마련되어야 한다.

본 연구 대상자의 좋은 죽음에 대한 인식은 생의 마지막 순간까지 사랑하는 사람과 자신의 의지대로 의사소통이 가능하고, 기계적 도움 없이 자연스럽게 평화로운 죽음을 맞이하는 것으로 나타났다. 사별한 독거노인[8]을 대상으로 좋은 죽음은 편안한 죽음, 임종 시까지 의식을 유지하는 것과 같은 맥락이며, 65세 이상 양로원 거주 노인[24]을 대상으로 죽음을 자연스럽게 받아들이는 것과 유사하다. 소극적으로 죽음을 기다리는 것이 아니라 남은 시간을 사랑하는 사람과 지내며 삶을 정리하고 행복한 끝맺음을 준비하고자 하는 의미가 담겨있는 것으로 생각된다. 좋은 죽음의 하부요인은 통제감, 임상증상, 친밀감 순으로 나타났다. 통제감은 마지막까지 의식을 유지하고 다른 사람과 의사소통할 수 있으며 신체적 기능을 통제할 수 있는 개인의 통제력을 의미하며 [19], 지역사회에 거주하는 65세 이상 노인을 대상으로 한 연구 [25]에서도 통제감을 유지하기를 원하는 것과 일치한다. 노인들은 자신의 통제감을 죽을 때까지 유지하는 것을 원한다고 볼 수 있다. 그러나 노인을 대상으로 한 연구[26]에서는 친밀감이 높게 나타났으며, 요양병원 입원 노인을 대상으로 한 연구[27]에서는 임상증상을 중요하게 인식하는 것으로 나타나 본 연구와 차이를 보였다. 이는 좋은 죽음에 대한 인식은 질병의 유무나 개인의 신념, 거주환경, 문화의 차이, 경제상태 등에 따라 영향을 받은 것으로 생각된다.

본 연구 대상자의 일반적 특성에 따른 좋은 죽음에 대한 인식은 연령과 학력에 따라 차이가 있었다. 연령이 높을수록 노화에 의해 용어에 대한 이해도가 낮으며 의료정보에 대한 접근성이 떨어지는 반면 연령이 낮을수록 죽음과 관련하여 교육이나 정보를 접

할 기회가 많아져서 좋은 죽음을 생각하는 빈도가 증가하기 때문인 것으로 사료된다. 학력은 고졸 이상이 무학보다 좋은 죽음에 대한 인식이 유의하게 높았다. 이는 교육수준이 높을수록 좋은 죽음에 대한 정보를 잘 활용하고 이해가 높기 때문으로 생각된다. 현재 이루어지고 있는 좋은 죽음에 대한 교육이 얼마나 실질적인 내용을 전달해주고 있는지에 대한 내용 구성 및 방법을 재검토한 후 획일화된 교육은 지양하고 연령과 학력을 고려하여 적합한 교육프로그램 개발과 체계적 적용이 필요할 것으로 생각된다. 독거노인을 대상으로 한 연구[28]에서 홀로 지내다 자신의 학습된 감정으로 고통스럽게 죽음을 맞이하는 것에 대한 두려움이 크게 나타났다. 따라서 독거노인의 연령이나 교육 수준에 따라 좋은 죽음에 대한 인식을 긍정적으로 변화시킨다면 생의 말기에 좋은 죽음을 맞이하게 되고 편안한 삶의 마지막을 위한 가능성과 변화의 기회를 얻게 될 것이다.

사전의료의향서에 대한 태도와 선호도 조사에서 대상자의 68.2%는 사전의료의향서에 대해 들어본 적이 없었다. 이는 지역사회 노인[12], 재가 노인[13]을 대상으로 사전의료의향서에 대한 인식이 부족하다고 나타난 연구와 일치하며, 양로원 노인[24]을 대상으로 죽음에 대한 언급을 피하고 싶어 하는 연구와 같은 맥락이다. 생의 말기에 원치 않는 처치에 대하여 자기결정권을 표현해야 하지만 이에 대한 교육과 지지가 부족한 실정임을 확인할 수 있었다. 최근 다양한 언론 매체를 통해 존엄사, 연명중단 등 죽음에 대한 노출 빈도가 많아지고 사회적 관심이 커지지만 독거노인에게 사전의료의향서의 인식 확산을 위한 적극적인 교육과 홍보가 필요함을 시사한다. 독거노인 자체가 가지고 있는 특성을 고려하여 대상자 중심 관점에서 사전의료의향서에 대한 의미와 필요성에 대한 교육이 먼저 이루어진 후 자신의 임종 치료 방향을 결정할 수 있을 때 작성의 기회가 제공되어야 할 것이다.

사전의료의향서에 대한 태도와 선호도 중 ‘갑작스러운 상황으로 의사결정을 할 수 없을 경우를 대비해 의학적 치료에 대해 미리 의사표현을 한다’는 문항에 대상자의 76.9%가 찬성하였으나, ‘사전의료의향서 작성 의지’ 문항은 43.9%만 찬성하였다. 지역사회 거주 노인을 대상으로 한 선행연구[28]에서는 사전의료의향서에 대해 충분한 설명 후에 작성 의지에 대해 86.7%가 찬성하였다. 이는 인지도는 낮으나 설명을 통해 필요성에 대해서 긍정적으로 인식함을 알 수 있으며 사전의료의향서에 대한 교육의 필요성을 뒷받침해 주고 있다. 재가 노인을 대상으로 사전의료의향서에 대한 인식이 사전의료의향서 작성 의지에 영향을 미친 요인으로 나타난 연구[18] 결과와 같은 맥락으로 노인들의 이해 수준을 고려한 정보나 교육을 통해 올바른 가치관을 정립하게 된다면 사전의료의향서 작성에 대한 혼란과 어려움을 줄일 수 있을 것으로 사료된다.

통증이 심하고 회복할 희망이 없으며 죽음이 임박했을 때 어느 치료방법을 선택할지에 대한 응답으로 대상자의 61.3%는 통증만 억제하고 생명연장치료는 거부한다고 하였다. 이는 지역사회 노인[4,7,17,23]을 대상으로 생명연장치료를 하지 않겠다는 연구 결과와 같다. 회복 가능성 없는 무의미한 연명치료로 인한 고통스러운 삶의 연장 대신 편안하고 존엄한 죽음을 선호하고 있으며, 자신의 의지대로 선택한 자기결정권과 연명의료중단 선택에 대해 긍정적으로 받아들이고 있다고 생각된다.

통증이 심하고 회복할 희망이 없으며 죽음이 임박했을 때 정보 제공을 받기 원하는지에 대해서 대상자의 49.1%는 증상, 예후에 대한 모든 정보를 제공받기를 원하였다. 지역사회 거주 노인[23]을 대상으로 한 연구에서도 80.5%가 본인의 증상 및 예후와 관련된 정보를 제공받기를 원했다. 이는 정확한 정보에 근거하여 자신들의 신체에 무슨 일이 일어날 것인지를 인지하고, 무의미한 연명치료에 대한 중단이나 임종 등에 대해 본인이 구체적으로 지시하고자 하는 의지가 크다는 것을 알 수 있다. Otte 등[29]의 연구에서 의료인은 대상자가 건강한 시기에 사전의료의향서를 작성했지만 기저질환의 진행이나 건강상태에 따라 사전의료의향서의 정기적인 검증이 필요하다고 하였다. 주체적 의사결정권을 발휘하여 존엄성을 유지한 좋은 죽음을 맞이하기 위한 권리가 존중되기를 바라는 것으로 생각되며, 현재 고령화 인구의 급속한 증가와 만성질환 비율을 감안할 때 다양한 보건, 의료, 복지, 문화 현장에서의 사전의료의향서에 대한 관심과 계몽적 프로그램은 필수적이다.

갑작스러운 상황으로 의사결정을 할 수 없을 경우를 대비해 의학적 치료에 대해 미리 의사표현을 하는 것에 찬성한 이유 중 ‘가족들에게 의사결정에 대한 부담감을 주고 싶지 않다’가 높았다. 지역사회 거주 노인[23]을 대상으로 한 연구 결과와 같으며 지역사회 노인[21]을 대상으로 다른 이에게 부담을 주고 싶지 않음을 확인한 연구 결과와 유사하다. 이는 노인을 대상[3]으로 임종 시 치료에 대한 최종 의사 결정자는 본인으로 나타난 연구 결과와 같으며 사전의료의향서를 통해 의사표현을 분명히 함으로써 가족성원의 갈등과 불안을 줄일 수 있고, 의료인도 대상자의 준비된 요구에 치료를 맞춤으로써 갈등을 줄일 수 있을 것으로 생각된다. 사전의료의향서 작성 시 포함하고 싶은 내용은 ‘질환의 말기 상황이 되었을 경우 진통제 사용과 같은 통증치료에 대한 결정’, ‘질환의 말기 상황이 되었을 경우 생명연장치료를 받을 것인지 여부에 관한 결정’ 순으로 나타났다.

갑작스러운 상황으로 의사결정을 할 수 없을 경우를 대비해 의학적 치료에 대해 미리 의사표현을 하는 것에 반대한 이유 중 ‘그러한 상황이 왔을 때 가족들이 판단할 것이다’가 높았다. 이는 지역사회 노인[21,23]을 대상으로 한 연구 결과와 일치하며, 65세

이상 양로원 노인[24]을 대상으로 한 연구에서는 사전의료의향서를 자녀가 작성하기를 원했다고 하였다. 이런 결과는 반복되는 의료 처치와 증상 악화, 죽음에 가까울수록 죽음에 대해 불안해하며 임종의 방향을 가족이나 의료인에게 의존하는 것으로 보인다. 또한 주제적으로 맞아야 할 삶과 죽음의 과제에서 삶의 마지막 순간을 생각하지 않는 노인들의 현실이며 사전의료의향서에 대한 정보의 부족이라고 할 수 있다. 사전의료의향서를 작성한 사람은 죽음에 대한 수용이 높게 나타났으므로[30] 건강한 노인들도 교육을 통해 자신의 희망과 가치관에 의해 직접 작성한 사전의료의향서에 근거하여 의학적 결정을 내림으로써 가족이나 보호자가 결정으로 인한 죄책감이나 부담을 경감시킬 수 있을 것이다. 또한 의료인은 임종까지 함께 하는 중요한 역할을 하므로 대상자의 의사결정 시 충분한 설명을 할 수 있어야 한다.

이상의 연구결과에 기반 하여 독거노인을 대상으로 하는 사전의료의향서에 대한 교육은 독거노인의 특성을 고려하여 충분한 지식과 이해를 바탕으로 사전의료의향서에 대한 정확한 인식과 판단이 이루어질 수 있도록 지속적으로 교육해야 함을 알 수 있었다. 또한 자신의 인생을 되돌아보는 과정을 거치며 의지와 신념에 의해 존엄한 죽음과 관련된 의사결정 과정이 가족과 함께 이루어지도록 관리 및 지원이 필수적으로 요구된다고 할 수 있다. 독거노인에게 남은 삶을 의미 있게 재구성하며 사전의료의향서 작성에 대해 존엄하고 자발적인 자기결정이 되기 위해서는 좋은 죽음에 대한 문화조성, 사전의료의향서에 대한 전문적인 교육과 홍보, 작성에 대한 의사 확인 또한 우리 사회의 책임이기도 하다.

노년기에 죽음을 준비하는 것은 생의 핵심 과업이며 성공적인 노화의 필수 조건이라 할 수 있다. 좋은 죽음을 맞이할 수 있도록 사전의료의향서의 윤리적 근거를 기반으로 사전의료의향서 작성성이 보편화 될 수 있도록 독거노인 개인의 수준과 이해정도를 고려한 교육, 상담이나 프로그램 마련이 요구된다. 이러한 사안들이 뒷받침될 때 노인은 삶의 목표와 우선순위를 다시 생각하게 되며 여생을 의미 있게 보낼 수 있고 스스로가 미래의 건강계획에 주도적으로 행동함으로써 삶의 질 향상과 존엄한 죽음을 맞이하는 데 도움이 될 것이다.

본 연구의 제한점은 첫째, 연구 대상자가 일 지역 경로당과 복지관에 오신 독거노인이었으며, 여성 독거노인이 69.9%로 많은 부분을 차지하였으므로 전체 독거노인에게 일반화 하는데 한계가 있다. 둘째, 대상자의 주관적 경제상태와 주관적 건강상태를 파악하였으므로, 독거노인의 실질적인 경제상태와 건강상태를 명확하게 알 수 없었다는 것이다. 특히 건강상태는 좋은 죽음에 대한 인식 및 사전의료의향서에 대한 태도와 선호도에 많은 영향

을 미칠 수 있는 변수임을 고려하였을 때 독거노인의 객관적인 건강상태를 파악하고 이에 따른 결과를 다시 확인하는 것이 필요하다. 셋째, 본 연구에서 사용한 사전의료의향서에 대한 태도와 선호도 도구는 전문가 타당도는 입증되었으나, 문항마다 예/아니오/잘 모름으로 응답하거나 다중응답으로 표기하도록 구성되어 있어, 죽음에 대한 인식에 따른 사전의료의향서에 대한 태도와 선호도의 관계를 파악하는데 한계가 있었다. 향후 사전의료의향서의 태도와 선호도를 구분하여 측정할 수 있는 신뢰도 높은 도구개발이 필요하다.

이러한 제한점에도 불구하고 본 연구는 지역사회 독거노인의 좋은 죽음에 대한 인식과 사전의료의향서에 대한 태도와 선호도를 파악하여 실천적, 정책적 시사점을 도출하였다는 것에 의의가 있다.

## 요약

**목적:** 독거노인의 좋은 죽음에 대한 인식과 사전의료의향서에 대한 태도와 선호도를 확인하여 독거노인의 사전의료의향서 작성을 위한 전략을 수립하는데 기초자료를 마련하고자 한다.

**방법:** 독거노인 173명을 대상으로 하여 2019년 7월 1일부터 9월 31일까지 설문지를 통하여 자료수집을 하였다. 수집된 자료는 SPSS WIN ver. 23.0 프로그램을 이용하여 기술 통계 및 t-test, One way ANOVA, Scheffé test를 실시하였다.

**결과:** 연구 대상 독거노인의 좋은 죽음에 대한 인식은 5점 척도의 평균 3.02점이었으며, 하위영역으로는 통제감, 임상증상, 친밀감 순이었다. 좋은 죽음에 대한 인식은 연령과 학력에 따라 유의한 차이가 있었다. 사전의료의향서에 대해 대상자의 118명(68.2%)은 의미를 모르거나 들어 본 적이 없었다고 하였다. 사전의료의향서 찬성 이유에 대해서는 ‘가족들에게 의사결정에 대한 부담감을 주고 싶지 않기 때문이다’, 반대 이유는 ‘그러한 상황이 왔을 경우, 가족들이 판단해 줄 것이다’가 가장 많았다.

**결론:** 독거노인의 좋은 죽음에 대한 인식은 평균 이상이었으나 사전의료의향서에 대해서는 모르는 대상자가 많았다. 독거노인이 죽음을 긍정적으로 인식하고 수용하도록 돕고, 자기결정권이 존중되는 사전의료의향서 작성에 대해 대상자들의 특성을 고려한 교육과 홍보 방법을 개발할 필요가 있으며, 가족이나 친구, 의료인과 의사소통하며 임종 치료를 포함한 사전의료의향서에 대한 결정이 이루어질 수 있도록 관심과 지지가 필요하다.

**중심단어:** 노인, 죽음, 사전의료의향서

## CONFLICT OF INTEREST

No potential conflict of interest relevant to this article was reported.

## ORCID

Eun-Jin Ryu, <https://orcid.org/0000-0003-0958-8501>

So-Eun Choi, <https://orcid.org/0000-0003-4805-3446>

## AUTHOR'S CONTRIBUTIONS

Concept, definition of intellectual content: EJR. Literature search: EJR, SEC. Formal analysis: SEC. Manuscript draft preparation: EJR. Manuscript editing, review and Final preparation: EJR, SEC.

## REFERENCES

1. Ng N, Santosa A, Weinehall L, Malmberg G. Living alone and mortality among older people in vsterbotten county in sweden: a survey and register-based longitudinal study. *BMC Geriatr* 2020;20:7.
2. Kim YS. The study of the impact of the family type on the health promoting behavior and physical and mental health of elderly people. *Health Soc Welf Rev* 2014;34:400-29.
3. Smith J, Borchelt M, Maier H, Jopp D. Health and well-being in the young, old and oldest old. *J Soc Issues* 2002;58:715-32.
4. Proulx K, Jacelon C. Dying with dignity: the good patient versus the good death. *Am J Hosp Palliat Med* 21:116-20.
5. Min DL, Cho EH. Concept analysis of good death in the Korean community. *J Korean Gerontol Nurs* 2017;19:28-38.
6. Lee MS, Kim YJ. Good death recognized by the elderly. *J Korea Contents Association* 2013;13:283-99.
7. Han NY, Park EW, Cheong YS, Yoo SM, Yoon HJ. Perception of a good death in the elderly. *Korean J Fam Med* 2002;23:769-77.
8. Yoo YS. A phenomenological study on the good death recognized by the bereaved elderly. *J Community Welf* 2017;62:1-31.
9. Brinkman-Stoppelenburg A, Rietjens JA, van der Heide A. The effects of advance care planning on end-of-life care: A systematic review. *Palliat Med* 2014;28:1000-25.
10. Zaros MC, Curtis JR, Silveira MJ, Elmore JG. Opportunity lost: end of life discussions in cancer patients who die in the hospital. *J Hos Med* 2013;8:334-40.
11. Chang WK, Ahn KJ, Kim MY, Kim YR, Han YJ. The role of a patient's family when the withdrawal of life-sustaining treatment is expected: a narrative analysis. *Korean J Med Ethics* 2015;18:172-89.
12. Hong SW, Kim SM. Knowledge regarding advance directives among community-dwelling elderly. *J Korean Acad Soc Nurs Edu* 2013;19:330-40.
13. Park J, Song JA. Knowledge, experience and preference on advance directives among community and facility dwelling elderly. *J Korean Gerontol Soc* 2013;33:581-600.
14. Ryu GH. Consideration on the life-sustaining treatment decision system. *Legal Theory Prac Rev* 2019;7:191-211.
15. Flannery L, Ramjan LM, Peters K. End-of-life decisions in the Intensive Care Unit (ICU) - Exploring the experiences of ICU nurses and doctors - A critical literature review. *Aust Criti Care* 2016;29:97-103.
16. Lee SB. Issues and tasks of the sog. well-dying act. *Kookmin Law Rev* 2017; 29:311-40.
17. Kim HS, Shin SR. The influence of social support among community dwelling elderly and their attitude towards the withdrawal of life-sustaining treatment : a mediating effect of self-esteem. *Korean J Adult Nurs* 2017;29:373-81.
18. Kim MS, Gang MH, Kim YO. Completion and related factors of advance directives in old adults. *J Korea Contents Association* 2018;18:240-7.
19. Schwartz CE, Mazor K, Rogers J, Ma Y, Reed G. Validation of a new measure of concept of a good death. *J Palliat Med* 2003;6:575-84.
20. Jeong HS. Recognition towards good death among physicians and nurses in an area [master's thesis]. Busan: Catholic Univ. of Pusan.; 2010. Korean.
21. Akabayashi A, Slingsby BT, Kai I. Perspectives on advance directives in Japanese society: A population-based questionnaire survey. *BMC med ethics* 2003;4:E5.
22. Yun ES. Knowledge, experience, attitudes and preferences toward advance directives among patients and their family members who are visiting the general hospital [master's thesis]. Seoul: Hanyang Univ.; 2009. Korean.
23. Jeong EO. Local community seniors' attitude toward and preference of advance directives [master's thesis]. Seoul: Chung-Ang Univ.; 2018. Korean.
24. Lee HT, Dai YT, Cheng SC, Hu WY, Chang M. Cultural perspectives of older nursing home residents regarding signing their own DNR directives in Eastern Taiwan: a qualitative pilot study. *BMC Palliat Care* 2016;15:45.
25. Kim CG. Factors influencing perception of good death among the community-dwelling elderly. *Korean J Hosp Palliat Care* 2014;17:151-60.

26. Kim MH, Kwon KJ, Lim YO. Study on 'good death' that Korean aged people recognize- blessed death -. Korean J Soc Welf 2004;56:195-213.
27. Kim EJ, Lee YJ. Good death awareness, attitudes toward advance directives and preferences for care near the end of life among hospitalized elders in long-term care hospitals. J Korean Acad Fundam Nurs 2019;26:197-209.
28. Kwon YE, Kim SY. Factors influencing the death anxiety of the elderly living alone. J Korea Academia-Industrial coop Soc 2016;17:262-9.
29. Otte IC, Elger B, Jung C, Bally KW. The utility of standardized advance directives: the general practitioners' perspective. Med Health Care Philos 2016;19:199-206.
30. Lynn T, Curtis A, Lagerwey MD. Association between attitude toward death and completion of advance directives. Omega (Westport) 2016;74:193-211.
